# Supplementary material for: Multi-Omics Investigation into Acute Myocardial Infarction: An Integrative Method Revealing Interconnections amongst the Metabolome, Lipidome, Glycome, and Metallome
Source: MDPI journal article supplement (doi:10.3390/metabo12111080), 2022-11-08
Supplement: s1 [file s1]

# Multi-Omics Investigation into Acute Myocardial Infarction: An Integrative Method Revealing Interconnections amongst the Metabolome, Lipidome, Glycome, and Metallome

Si Ying Lim <sup>1,2</sup>, Felicia Li Shea Lim <sup>2</sup>, Inmaculada Criado-Navarro <sup>2</sup>, Xin Hao Yeo <sup>2</sup>, Hiranya Dayal <sup>2</sup>, Sri Dhruti Vemulapalli <sup>2</sup>, Song Jie Seah <sup>2</sup>, Anna Karen Carrasco Laserna <sup>2,3</sup>, Xiaoxun Yang <sup>4</sup>, Sock Hwee Tan <sup>4</sup>, Mark Y. Chan <sup>4</sup> and Sam Fong Yau Li <sup>1,2,\*</sup>

<sup>1</sup> NUS Graduate School's Integrative Sciences & Engineering Programme (ISEP), National University of Singapore, Singapore 119077, Singapore

<sup>2</sup> Department of Chemistry, National University of Singapore, Singapore 117543, Singapore

<sup>3</sup> Central Instrumentation Facility (Laguna Campus), Office of the Vice President for Research and Innovation, De La Salle University, Manila 1004, Philippines

<sup>4</sup> Cardiovascular Research Institute, Yong Loo Lin School of Medicine, National University of Singapore, Singapore 117599, Singapore

\* Correspondence: chmlifys@nus.edu.sg; Tel.: +65-6516-2681; Fax: +65-6779-1691

- Supplementary Methods
- Supplementary Tables S1-2
- Supplementary Figures S1-9

## Supplementary Methods

### 1. Chemicals and reagents

For glycan extraction and analysis, Peptide:N-glycosidase F (PNGaseF), magnetic beads, their associated buffers (digestion buffer for PNGase F digestion and wash buffer for magnetic beads-based purification respectively), and size standards were purchased from Thermo Fisher Scientific as part of their GlycanAssure™ HyPerformance APTS kit with CE module (catalogue number: A38927). 8-aminopyrene-1,3,6-trisulfonic acid (APTS) and 2-picoline borane were purchased from Sigma-Aldrich. APTS Maltodextrin ladder used for the generation of glucose unit (GU) calibration curve was purchased from Agilent Technologies (Santa Clara, CA, USA). Exoglycosidases and glycan standards used for glycan identification were purchased from New England Biolabs (Ipswich, MA, USA) and Dextra Laboratories (Reading, UK) respectively.

For elemental extraction and analysis, the multi-element standard (IV-ICPMS-71A) was purchased from Inorganic Ventures (Christiansburg, VA, USA), and it contains the following elements in 3% nitric acid: Ag, Al, As, B, Ba, Be, Ca, Cd, Ce, Co, Cr, Cs, Cu, Dy, Er, Eu, Fe, Ga, Gd, Ho, K, La, Lu, Mg, Mn, Na, Nd, Ni, P, Pb, Pr, Rb, S, Se, Sm, Sr, Th, Ti, Tm, U, V, Yb, Zn. The inductively coupled plasma-mass spectrometry (ICP-MS) internal standard mix was purchased from Agilent Technologies (contains Bi, Ge, In, Li-6, Rh, Sc and Tb). The 60% nitric acid (ultrapure; any metals at sub ppt levels) used for all experiments was purchased from Kanto Chemical Co. (Tokyo, Japan).

### 2. Glycomics sample preparation and CE-LIF analysis

Extraction and preparation of N-glycans for CE-LIF were performed as described in our previous work with modification.<sup>56</sup> Briefly, N-glycans in 2 µL of blood plasma sample were released via the addition of 0.75 µL of PNGase F and 1.5 µL of digestion buffer and incubating at 55 °C in a heat block. Released glycans were labelled with a fluorescence tag by adding 10 µL of APTS (20 mM in 3.6 M citric acid) and 10 µL of 2-picolane borane (0.2M in DMSO) and incubating at 37 °C for 18 h in a heat block. Solid-phase extraction of the released glycans with magnetic beads was done by adding 50 µL of magnetic beads and

185  $\mu$ L of acetonitrile and captured with the aid of a magnetic stand. Purification of captured glycans was done with three washes of 100  $\mu$ L wash buffer. Purified glycans for CE-LIF analysis were then eluted with 25  $\mu$ L of elution buffer.

N-glycan samples were analyzed using a CE-LIF (Applied Biosystems™ 3500xL Genetic Analyzer, Thermo Fisher Scientific). Briefly, a CE loading matrix was prepared by adding 2  $\mu$ L GeneScan™ 600 LIZ™ dye size standard and 2  $\mu$ L of Landmark Red in 200  $\mu$ L CE loading buffer, and incubated at 60 °C for 5 min. Analysis was then done with 2  $\mu$ L of the purified glycan sample and 8  $\mu$ L of the CE loading matrix added to each well of a 96-well reaction plate.

Data acquisition was done using the Applied Biosystems™ GlycanAssure™ Glycan Acquisition Software. The peaks generated were processed with the accompanying Data Analysis Software. To account for run-to-run variation, peak areas used for further statistical analysis were normalised to the total area of the measured peaks.

### 3. Metallomics sample preparation and ICP-MS/MS analysis

To obtain elemental digestates from human blood plasma, acid digestion aided with heating via a hotplate was done. Specifically, 80  $\mu$ L blood plasma was added into a 15 mL polypropylene centrifuge tube, followed by the addition of 80  $\mu$ L ultrapure water and 80  $\mu$ L ultrapure nitric acid. The centrifuge tubes were gently swirled to allow mixing. Immediately after, the samples were heated using a hotplate at 98 °C for 2 hours. To further process the samples for ICP-MS analysis, the digested samples were diluted to 8 mL with ultrapure water. The diluted samples were then filtered using 2.2  $\mu$ m PTFE syringe filters into clean centrifuge tubes. Blank samples were prepared in the same way, but with the blood plasma component replaced with ultrapure water. The samples were then stored at 4 °C until ICP-MS analysis.

ICP-MS analysis was done using the 8900 ICP-MS/MS system (equipped with a triple quadrupole mass spectrometer) from Agilent Technologies. To correct for matrix effects and non-spectral interferences, multiple elements from the internal standard mix were spiked online and elemental concentrations were normalised to the internal standards. To obtain optimal precision and accuracy, the internal standard analyte for each element was selected as close in mass number as possible to that of the analyte element, with ionisation energies considered as well. To obtain elemental concentrations of the samples, external standard calibration was done using the multi-element standard prepared in various concentrations (0, 0.1, 0.5, 1.0, 10.0, 100.0, 500.0, 1000.0 ppb). For optimal accuracy using a 6-point calibration curve, the lower-most points (0.1 and 0.5 ppb) were removed for external calibration curve generation for elements with higher concentrations, while the upper-most points (500 and 1000 ppb) were removed from external calibration curve generation for elements with concentrations lower than 10 ppb. It was noted that a few elements (Al, Ca, K, Mg, Na, P, S) were present in higher abundance where their concentrations in some or all the plasma samples exceed the external standard calibration range. To determine their concentrations, the samples were diluted (dilution factor = 50) and re-analysed by the ICP-MS.

**Table S1.** List of significantly altered metabolite features based on PLS-DA's VIP score, Mann-Whitney test, and fold-change criteria.

| RT m/z       | VIP (PC1) | VIP (PC2) | Fold-change | p-value               | Level of identification | Formula         | Compound name                                                                                              | Class                               | HMDB code   |
|--------------|-----------|-----------|-------------|-----------------------|-------------------------|-----------------|------------------------------------------------------------------------------------------------------------|-------------------------------------|-------------|
| 6.83 472.29  | 2.32      | 1.97      | 0.39        | $6.0 \times 10^{-5}$  | 2                       | C27H21ClFN3O2   | Lixivaptan                                                                                                 | 2-arylbenzofuran flavonoids         | HMDB0254131 |
| 6.41 613.36  | 2.04      | 1.73      | 1.85        | $7.6 \times 10^{-9}$  | 2                       | C11F23CO2H      | Perfluorododecanoic acid                                                                                   | Alkyl halides                       | HMDB0256318 |
| 10.18 413.33 | 2.66      | 2.26      | 0.64        | $2.1 \times 10^{-6}$  | 2                       | C19H25Cl2N3O1-3 | 1-Piperazinecarboxylic acid, 4-((3,4-dichlorophenyl)acetyl)-3-(1-pyrrolidinylmethyl)-, methyl ester, (3R)- | Benzene and substituted derivatives | HMDB0252928 |
| 4.57 283.08  | 2.21      | 1.87      | 1.86        | $1.3 \times 10^{-5}$  | 2                       | C13H16O7        | D-Vacciniin                                                                                                | Benzene and substituted derivatives | HMDB0038492 |
| 4.92 236.09  | 2.08      | 0.18      | 1.84        | $8.3 \times 10^{-10}$ | 2                       | C7H11NO6S       | S-Cysteinosuccinic acid                                                                                    | Carboxylic acids and derivatives    | HMDB0029418 |
| 4.60 208.13  | 2.20      | 1.99      | 0.51        | $5.9 \times 10^{-6}$  | 2                       | C11H13NO3       | N-Acetyl-L-phenylalanine                                                                                   | Carboxylic acids and derivatives    | HMDB0000512 |
| 5.07 716.85  | 2.32      | 2.06      | 2.06        | $3.1 \times 10^{-7}$  | 2                       | C36H38N4O12     | Diisodityrosine                                                                                            | Carboxylic acids and derivatives    | HMDB0029798 |
| 4.84 379.16  | 3.18      | 2.81      | 4.00        | $2.5 \times 10^{-9}$  | 2                       | C20H32N2O3S     | Carbosulfan                                                                                                | Coumarans                           | HMDB0249647 |
| 4.33 801.42  | 2.06      | 1.75      | 2.63        | $2.7 \times 10^{-4}$  | 2                       | C51H94O6        | 15-Palmitoylsolamin                                                                                        | Fatty Acyls                         | HMDB0036341 |
| 9.41 355.29  | 2.08      | 1.78      | 0.59        | $3.5 \times 10^{-7}$  | 2                       | C21H40O4        | Stearoyllactic acid                                                                                        | Fatty Acyls                         | HMDB0033372 |
| 10.72 251.20 | 2.06      | 1.57      | 0.60        | $4.1 \times 10^{-5}$  | 2                       | C16H26O2        | 4,7,10,13-Hexadecatetraenoate                                                                              | Fatty Acyls                         | HMDB0246620 |
| 5.70 433.21  | 3.58      | 3.15      | 4.81        | $5.2 \times 10^{-11}$ | 2                       | C21H22O10       | Eriodictin                                                                                                 | Flavonoids                          | HMDB0037480 |
| 5.24 405.18  | 3.14      | 2.72      | 4.58        | $5.3 \times 10^{-10}$ | 2                       | C20H19ClO7      | 7-Chloro-3,4',5,6,8-pentamethoxyflavone                                                                    | Flavonoids                          | HMDB0033069 |
| 4.59 723.37  | 2.26      | 2.07      | 1.99        | $5.4 \times 10^{-7}$  | 2                       | C48H56N2O4      | Bismurrayafoline E                                                                                         | Indoles and derivatives             | HMDB0037741 |
| 4.84 204.10  | 1.69      | 1.42      | 1.62        | $8.5 \times 10^{-4}$  | 2                       | C11H9NO3        | Indolepyruvate                                                                                             | Indoles and derivatives             | HMDB0060484 |
| 5.71 591.32  | 1.88      | 1.52      | 2.00        | $2.3 \times 10^{-3}$  | 2                       | C32H48O10       | Aplysiatoxin, 17-debromo-                                                                                  | Macrolides and analogues            | HMDB0248517 |
| 3.90 370.08  | 4.69      | 4.15      | 9.00        | $1.1 \times 10^{-15}$ | 2                       | C15H17NO10      | Salicyluric beta-D-glucuronide                                                                             | Organooxygen compounds              | HMDB0240252 |
| 5.38 219.95  | 3.76      | 3.32      | 5.37        | $3.8 \times 10^{-10}$ | 2                       | C8H15NO6        | Aldehydo-N-acetyl-D-glucosamine                                                                            | Organooxygen compounds              | HMDB0062641 |
| 4.99 302.20  | 1.85      | 1.44      | 0.64        | $2.9 \times 10^{-4}$  | 2                       | C8H15NO9S       | N-Acetylgalactosamine 4-sulphate*                                                                          | Organooxygen compounds              | HMDB0000781 |

|              |      |      |      |                       |   |             |                                                                |                                  |             |
|--------------|------|------|------|-----------------------|---|-------------|----------------------------------------------------------------|----------------------------------|-------------|
| 5.38 137.02  | 4.19 | 3.64 | 7.18 | $3.2 \times 10^{-10}$ | 2 | C7H6O3      | alpha-Furyl methyl diketone                                    | Organooxygen compounds           | HMDB0032920 |
| 8.02 241.18  | 2.35 | 2.15 | 0.53 | $3.9 \times 10^{-10}$ | 2 | C9H14N4O4   | 1-Ethoxy-N-(3-morpholin-4-yloxadiazol-3-ium-5-yl)methanimidate | Oxazinanes                       | HMDB0245703 |
| 5.34 543.28  | 2.25 | 2.01 | 2.18 | $6.1 \times 10^{-10}$ | 2 | C40H64      | 15-cis-Phytoene                                                | Prenol lipids                    | HMDB39093   |
| 5.08 631.35  | 1.46 | 1.11 | 1.54 | $9.4 \times 10^{-5}$  | 2 | C38H46O8    | (R)-6'-O-(4-Geranyloxy-2-hydroxycinnamoyl)-marmin              | Prenol lipids                    | HMDB0039061 |
| 4.66 264.01  | 4.19 | 3.68 | 5.39 | $6.0 \times 10^{-13}$ | 2 | C9H10F2N2O5 | 2',2'-Difluorodeoxyuridine                                     | Pyrimidine nucleosides           | HMDB0060727 |
| 7.45 573.24  | 4.32 | 3.84 | 2.98 | $1.6 \times 10^{-12}$ | 2 | C33H35FN2O6 | O-Hydroxyatorvastatin                                          | Pyrroles                         | HMDB0061015 |
| 10.39 241.18 | 2.13 | 1.59 | 0.57 | $1.6 \times 10^{-5}$  | 2 | C19H30O2    | Etiocolanolone                                                 | Steroids and steroid derivatives | HMDB0000490 |
| 5.73 593.34  | 2.27 | 1.95 | 3.39 | $5.0 \times 10^{-4}$  | 2 | C33H46N4O6  | L-Urobilin                                                     | Tetrapyrroles and derivatives    | HMDB0240259 |
| 4.62 202.11  | 2.02 | 1.75 | 1.74 | $1.9 \times 10^{-9}$  | 4 |             |                                                                |                                  |             |
| 5.16 319.01  | 2.38 | 2.04 | 1.86 | $2.0 \times 10^{-5}$  | 4 |             |                                                                |                                  |             |
| 7.18 213.15  | 2.07 | 1.81 | 0.55 | $3.8 \times 10^{-7}$  | 4 |             |                                                                |                                  |             |
| 7.64 239.16  | 2.48 | 2.22 | 0.51 | $2.4 \times 10^{-9}$  | 4 |             |                                                                |                                  |             |
| 5.51 609.25  | 2.21 | 1.90 | 2.05 | $1.4 \times 10^{-7}$  | 4 |             |                                                                |                                  |             |
| 6.27 537.33  | 2.26 | 1.98 | 2.59 | $5.5 \times 10^{-7}$  | 4 |             |                                                                |                                  |             |
| 7.00 653.19  | 3.32 | 2.88 | 5.16 | $5.0 \times 10^{-9}$  | 4 |             |                                                                |                                  |             |
| 7.55 215.16  | 3.16 | 2.92 | 0.45 | $1.3 \times 10^{-9}$  | 4 |             |                                                                |                                  |             |
| 4.66 150.06  | 3.90 | 3.40 | 4.22 | $0.0 \times 0.0$      | 4 |             |                                                                |                                  |             |
| 5.65 835.40  | 2.73 | 2.16 | 4.31 | $1.4 \times 10^{-4}$  | 4 |             |                                                                |                                  |             |
| 7.78 325.18  | 1.57 | 1.27 | 1.56 | $3.4 \times 10^{-3}$  | 4 |             |                                                                |                                  |             |
| 10.09 409.33 | 1.93 | 1.49 | 0.66 | $1.6 \times 10^{-4}$  | 4 |             |                                                                |                                  |             |
| 10.52 135.12 | 1.69 | 1.30 | 0.65 | $5.3 \times 10^{-4}$  | 4 |             |                                                                |                                  |             |

**Table S2.** List of significantly altered lipidomic features based on PLS-DA's VIP score, Mann Whitney test, and fold-change criteria.

| RT m/z           | Regulation<br>(up/down) | VIP<br>(PC1) | VIP<br>(PC2) | Fold-<br>change | p-value               | Level of identifica-<br>tion | Formula            | Compound name                                                                  | Class                                    | HMDB code       |
|------------------|-------------------------|--------------|--------------|-----------------|-----------------------|------------------------------|--------------------|--------------------------------------------------------------------------------|------------------------------------------|-----------------|
| 1.44 540.36      | DOWN                    | 2.7407       | 2.788        | 0.53            | $1.2 \times 10^{-5}$  | 2                            | C22H27ClFN7O4<br>S | Encorafenib                                                                    | Azoles                                   | HMDB030488<br>7 |
| 4.46 277.14      | DOWN                    | 5.4309       | 5.2609       | 0.32            | $3.5 \times 10^{-17}$ | 2                            | C16H22O4           | Monoethylhexyl phthalic acid                                                   | Benzene and substirtued deriva-<br>tives | HMDB001324<br>8 |
| 15.3 972.9       | UP                      | 2.2544       | 1.9839       | 1.64            | $7.9 \times 10^{-8}$  | 2                            | C20H4Cl4I4O5       | Rose bengal                                                                    | Benzopyrans                              | HMDB003661<br>3 |
| 11.02 654.6      | UP                      | 2.0782       | 1.9047       | 1.51            | $4.7 \times 10^{-6}$  | 2                            | C30H49N6O10        | Pentasinine                                                                    | Carboxylic acids and derivatives         | HMDB002980<br>3 |
| 14.7 666.62      | DOWN                    | 2.3483       | 2.1523       | 0.53            | $5.6 \times 10^{-6}$  | 2                            | C45H76O2           | CE(18:2(9Z,12Z))                                                               | Cholesteryl Esters                       | HMDB000061<br>0 |
| 10.64 615.5      | UP                      | 2.3945       | 2.1185       | 1.66            | $2.8 \times 10^{-6}$  | 2                            | C37H68O5           | palmitic acid                                                                  | Diacylglycerols                          | HMDB000713<br>1 |
| 15.39 605.5<br>5 | UP                      | 2.7135       | 2.4523       | 1.69            | $1.8 \times 10^{-6}$  | 2                            | C39H74O5           | DG(18:0/18:1(9Z)/0: 0)                                                         | Diacylglycerols                          | HMDB000716<br>0 |
| 1.12 316.25      | DOWN                    | 2.51         | 2.3011       | 0.58            | $9.4 \times 10^{-7}$  | 2                            | C17H33NO4          | Decanoylcarnitine                                                              | Fatty Acids                              | HMDB000065<br>1 |
| 1.54 230.25      | DOWN                    | 3.2182       | 3.1133       | 0.45            | $6.5 \times 10^{-7}$  | 2                            | C14H28O            | Tetradecanal                                                                   | Fatty Acids                              | HMDB003428<br>3 |
| 14.69 299.2<br>7 | DOWN                    | 2.7342       | 2.4149       | 0.36            | $4.1 \times 10^{-6}$  | 2                            | C22H38O2           | Docosatrienoic acid                                                            | Fatty Acids                              | HMDB000282<br>3 |
| 2.51 302.3       | DOWN                    | 4.0751       | 3.8635       | 0.32            | $9.5 \times 10^{-10}$ | 2                            | C18H34O2           | Oleic acid                                                                     | Fatty Acids                              | HMDB000020<br>7 |
| 1 314.23         | DOWN                    | 2.3252       | 2.1076       | 0.61            | $3.0 \times 10^{-6}$  | 2                            | C17H31NO4          | 9-Decenoylcarnitine                                                            | Fatty Acids                              | HMDB001320<br>5 |
| 1.68 344.28      | DOWN                    | 2.1483       | 2.0289       | 0.64            | $8.2 \times 10^{-6}$  | 2                            | C19H37NO4          | Dodecanoylcarnitine                                                            | Fatty Acids                              | HMDB000225<br>0 |
| 1.58 368.28      | DOWN                    | 2.5025       | 2.312        | 0.58            | $3.9 \times 10^{-7}$  | 2                            | C21H37NO4          | (5Z,8Z)- Tetradecadienoylcarn -itine                                           | Fatty Acids                              | HMDB024075<br>6 |
| 4.06 424.34      | DOWN                    | 2.4197       | 2.2101       | 0.60            | $6.7 \times 10^{-9}$  | 2                            | C25H45NO4          | O-Linoleoylcarnitine                                                           | Fatty Acids                              | HMDB024078<br>0 |
| 10.99 577.5<br>2 | UP                      | 2.0163       | 1.8505       | 1.51            | $1.9 \times 10^{-5}$  | 2                            | C37H68O4           | Cohibin D*                                                                     | Fatty Acyls                              | HMDB003539<br>8 |
| 14.66 944.8<br>7 | UP                      | 2.0494       | 1.8162       | 1.53            | $1.2 \times 10^{-6}$  | 2                            | C42H40O25          | Apigenin 4'-[p-coumaroyl-(→2)-glucuronyl-(1→2)-glucuronide] 7-glucu-<br>ronide | Flavonoids                               | HMDB003829<br>6 |
| 11.48 640.5<br>9 | UP                      | 2.2741       | 2.119        | 1.57            | $2.5 \times 10^{-5}$  | 2                            | C32H31O14          | Malvidin 3-(6"-p-coumarylglucoside)                                            | Flavonoids                               | HMDB030190<br>3 |
| 14.68 671.5<br>7 | DOWN                    | 2.9795       | 2.7036       | 0.39            | $9.9 \times 10^{-7}$  | 2                            | C43H74O5           | DG(20:0/20:5(5Z,8Z,11Z,14Z,17Z)/0:0)                                           | Glycerolipids                            | HMDB000737<br>5 |
| 11.02 339.2<br>9 | UP                      | 2.3923       | 2.254        | 1.66            | $6.5 \times 10^{-5}$  | 2                            | C21H40O4           | MG(18:1(11Z)/0:0/0: 0)                                                         | Glycerolipids                            | HMDB001156<br>6 |
| 2.44 396.31      | DOWN                    | 2.9146       | 2.6465       | 0.53            | $8.9 \times 10^{-7}$  | 2                            | C23H38O4           | MG(20:4(5Z,8Z,11Z, 14Z)/0:0/0:0)                                               | Glycerolipids                            | HMDB001157<br>8 |

|                          |      |        |        |      |                       |   |             |                                                  |                                  |             |
|--------------------------|------|--------|--------|------|-----------------------|---|-------------|--------------------------------------------------|----------------------------------|-------------|
| 9.88 746.51              | DOWN | 2.2165 | 2.0069 | 0.64 | $3.8 \times 10^{-8}$  | 2 | C41H76NO7P  | PE(P-18:1(9Z)/18:2(9Z,12Z))                      | Glycerophospholipids             | HMDB0011442 |
| 10.16 698.5 <sub>1</sub> | DOWN | 2.1331 | 1.9399 | 0.55 | $1.3 \times 10^{-9}$  | 2 | C39H74NO7P  | PE(P-18:1(9Z)/16:1(9Z))                          | Glycerophospholipids             | HMDB0011438 |
| 10.27 902.5 <sub>1</sub> | UP   | 2.3498 | 2.1532 | 1.54 | $1.7 \times 10^{-9}$  | 2 | C48H76NO10P | PS(22:6(4Z,7Z,10Z,13Z,16Z,19Z)/20:3(8Z,11Z,14Z)) | Glycerophospholipids             | HMDB0012448 |
| 10.27 852.5              | UP   | 2.8868 | 2.6142 | 1.80 | $3.5 \times 10^{-13}$ | 2 | C44H74NO10P | PS(22:6(4Z,7Z,10Z,13Z,16Z,19Z)/20:3(8Z,11Z,14Z)) | Glycerophospholipids             | HMDB0012442 |
| 10.49 700.5 <sub>2</sub> | DOWN | 2.8415 | 2.8256 | 0.49 | $2.1 \times 10^{-5}$  | 2 | C39H76NO7P  | PE(18:0/16:0)                                    | Glycerophospholipids             | HMDB0008989 |
| 10.57 726.5 <sub>4</sub> | DOWN | 2.5896 | 2.3485 | 0.61 | $3.1 \times 10^{-10}$ | 2 | C41H80NO8P  | PE(18:1(9Z)/18:0)                                | Glycerophospholipids             | HMDB0009057 |
| 15.34 631.5 <sub>7</sub> | UP   | 2.3813 | 2.1827 | 1.89 | $1.4 \times 10^{-4}$  | 2 | C41H76O5    | DG(24:1(15Z)/14:1(9Z)/0:0)*                      | Glycerophospholipids             | HMDB0007821 |
| 9.49 804.55              | DOWN | 2.3011 | 2.1476 | 0.62 | $4.4 \times 10^{-9}$  | 2 | C45H90NO8P  | PC(22:0/15:0)                                    | Glycerophospholipids             | HMDB0008527 |
| 9.19 846.6               | DOWN | 2.2381 | 2.0012 | 0.57 | $5.2 \times 10^{-5}$  | 2 | C48H96NO8P  | PC(22:0/18:0)                                    | Glycerophospholipids             | HMDB0008530 |
| 10.16 750.5 <sub>4</sub> | DOWN | 2.2684 | 2.2338 | 0.55 | $1.0 \times 10^{-4}$  | 2 | C43H78NO8P  | PE(20:4(8Z,11Z,14Z,17Z)/18:0)                    | Glycerophospholipids             | HMDB0009420 |
| 10.36 718.5 <sub>4</sub> | UP   | 3.0927 | 2.7182 | 1.97 | $5.9 \times 10^{-8}$  | 2 | C39H76NO8P  | PE(16:0/18:1(9Z))                                | Glycerophospholipids             | HMDB0008927 |
| 11.66 740.5 <sub>3</sub> | DOWN | 2.5112 | 2.2883 | 0.47 | $1.1 \times 10^{-5}$  | 2 | C39H76NO8P  | PC(18:4(6Z,9Z,12Z,15Z)/15:0)*                    | Glycerophospholipids             | HMDB0009250 |
| 9.35 730.54              | DOWN | 2.0865 | 2.062  | 0.65 | $5.9 \times 10^{-7}$  | 2 | C40H76NO8P  | PC(18:2(9Z,12Z)/14:0)*                           | Glycerophospholipids             | HMDB0008130 |
| 11.66 740.5 <sub>3</sub> | DOWN | 2.5112 | 2.2883 | 0.47 | $1.1 \times 10^{-5}$  | 2 | C41H74NO8P  | PC(18:4(6Z,9Z,12Z,15Z)/15:0)                     | Glycerophospholipids             | HMDB0008231 |
| 9.49 782.57              | DOWN | 2.1568 | 2.0107 | 0.65 | $4.6 \times 10^{-9}$  | 2 | C44H80NO8P  | PC(20:4(5Z,8Z,11Z,14Z)/16:0)                     | Glycerophospholipids             | HMDB0008429 |
| 7.64 401.34              | DOWN | 2.2936 | 2.6701 | 0.42 | $1.0 \times 10^{-3}$  | 2 | C28H48O     | Pollinastanol                                    | Organic trisulfides              | HMDB0034418 |
| 1.46 308.12              | DOWN | 1.9283 | 2.0061 | 0.35 | $4.5 \times 10^{-2}$  | 2 | C18H29NO3   | Betaxolol                                        | Phenols                          | HMDB0014341 |
| 14.69 203.1 <sub>8</sub> | DOWN | 2.3877 | 2.2515 | 0.53 | $1.8 \times 10^{-4}$  | 2 | C15H22      | beta-Vatirenene                                  | Prenol Lipids                    | HMDB0059676 |
| 14.7 257.23              | DOWN | 2.2154 | 2.0102 | 0.60 | $8.2 \times 10^{-5}$  | 2 | C14H24O4    | Monomenthyl succinate                            | Prenol lipids                    | HMDB0036143 |
| 3.79 472.34              | DOWN | 2.9761 | 2.6682 | 0.49 | $8.7 \times 10^{-6}$  | 2 | C29H42O4    | Ubiquinone-4                                     | Prenol Lipids                    | HMDB0006710 |
| 14.69 369.3 <sub>5</sub> | DOWN | 2.063  | 1.8893 | 0.60 | $8.2 \times 10^{-6}$  | 2 | C27H46O     | Cholesterol                                      | Steroids and Steroid derivatives | HMDB0000067 |
| 14.1 367.34              | DOWN | 2.0602 | 1.9187 | 0.61 | $1.1 \times 10^{-3}$  | 2 | C27H44O     | 8-Dehydrocholesterol                             | Steroids and Steroid derivatives | HMDB0006842 |
| 15.37 904.8 <sub>3</sub> | UP   | 2.2741 | 2.0304 | 1.58 | $8.0 \times 10^{-9}$  | 2 | C57H106O6   | TG(16:1(9Z)/18:0/20:1(11Z))                      | Triacylglycerols                 | HMDB0005424 |
| 15.07 890.8 <sub>2</sub> | UP   | 2.0449 | 1.9007 | 1.65 | $2.0 \times 10^{-5}$  | 2 | C56H104O6   | TG(17:0/18:1(9Z)/18:1(9Z))                       | Triacylglycerols                 | HMDB0062701 |
| 16.03 906.8 <sub>5</sub> | UP   | 2.2827 | 2.1978 | 1.64 | $9.2 \times 10^{-5}$  | 2 | C57H108O6   | TG(18:0/18:0/18:1(9Z))                           | Triacylglycerols                 | HMDB0005395 |

|                  |      |        |        |      |                      |   |           |                                    |                  |                 |
|------------------|------|--------|--------|------|----------------------|---|-----------|------------------------------------|------------------|-----------------|
| 16.02 911.8<br>1 | UP   | 2.125  | 2.0093 | 1.54 | $3.2 \times 10^{-5}$ | 2 | C59H106O6 | TG(18:0/18:0/20:4(5 Z,8Z,11Z,14Z)) | Triacylglycerols | HMDB000539<br>8 |
| 15.33 946.8<br>8 | UP   | 2.286  | 2.0256 | 1.58 | $6.7 \times 10^{-9}$ | 2 | C60H112O6 | TG(15:0/22:2(13Z,16 Z)/20:0)       | Triacylglycerols | HMDB004354<br>3 |
| 15.33 930.8<br>5 | UP   | 2.209  | 1.9492 | 1.63 | $5.8 \times 10^{-8}$ | 2 | C59H108O6 | TG(18:1(9Z)/18:1(9Z)/20:1(11Z))    | Triacylglycerols | HMDB000545<br>4 |
| 16.63 934.8<br>8 | UP   | 2.2138 | 2.0893 | 1.76 | $2.7 \times 10^{-4}$ | 2 | C59H112O6 | TG(18:0/18:1(9Z)/20 :0)            | Triacylglycerols | HMDB000540<br>2 |
| 14.7 219.21      | DOWN | 2.0704 | 1.9939 | 0.60 | $8.5 \times 10^{-4}$ | 4 |           |                                    |                  |                 |
| 14.7 233.23      | DOWN | 2.6706 | 2.4444 | 0.49 | $3.2 \times 10^{-5}$ | 4 |           |                                    |                  |                 |
| 14.69 243.2<br>1 | DOWN | 2.437  | 2.2852 | 0.53 | $1.5 \times 10^{-4}$ | 4 |           |                                    |                  |                 |
| 14.7 271.24      | DOWN | 2.7088 | 2.4347 | 0.51 | $3.2 \times 10^{-5}$ | 4 |           |                                    |                  |                 |
| 11.02 595.5<br>3 | UP   | 2.728  | 2.5127 | 1.76 | $1.2 \times 10^{-5}$ | 4 |           |                                    |                  |                 |
| 9.1 802.53       | DOWN | 2.1664 | 2.0032 | 0.55 | $3.6 \times 10^{-5}$ | 4 |           |                                    |                  |                 |
| 15.42 861.7<br>9 | UP   | 2.0925 | 1.997  | 1.53 | $2.8 \times 10^{-4}$ | 4 |           |                                    |                  |                 |
| 15.57 903.8<br>2 | UP   | 2.2611 | 2.0262 | 1.63 | $8.9 \times 10^{-6}$ | 4 |           |                                    |                  |                 |
| 15.68 923.8      | UP   | 2.3777 | 2.1677 | 2.32 | $1.7 \times 10^{-4}$ | 4 |           |                                    |                  |                 |

---

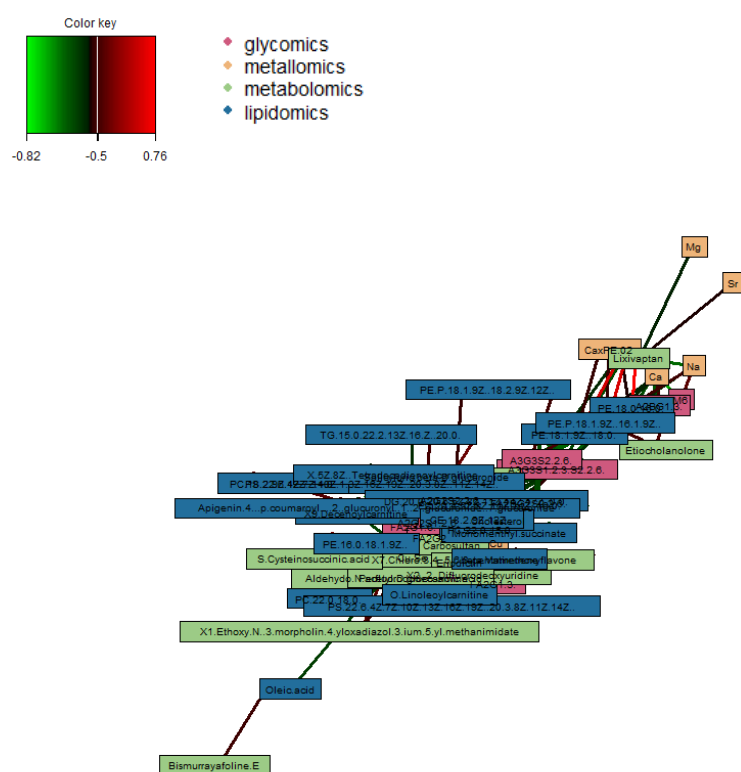

**Figure S1.** Relevance network plot of highly correlated ( $r > 0.5$ ;  $p$ -value  $< 0.05$ ) significant features across all four omics layers (glycomics + metallomics + metabolomics + lipidomics).



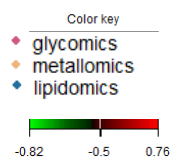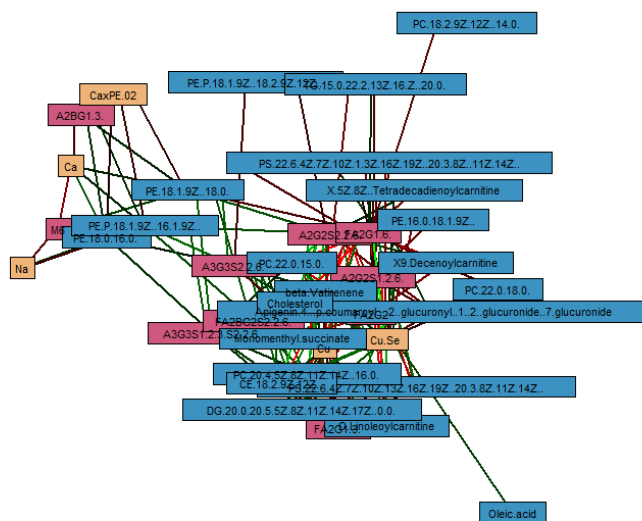

**Figure S2.** Tri-omics (glycomics + metallomics + lipidomics) relevance network plot of highly significant features correlated ( $r > 0.5$ ;  $p$ -value  $< 0.05$ ).



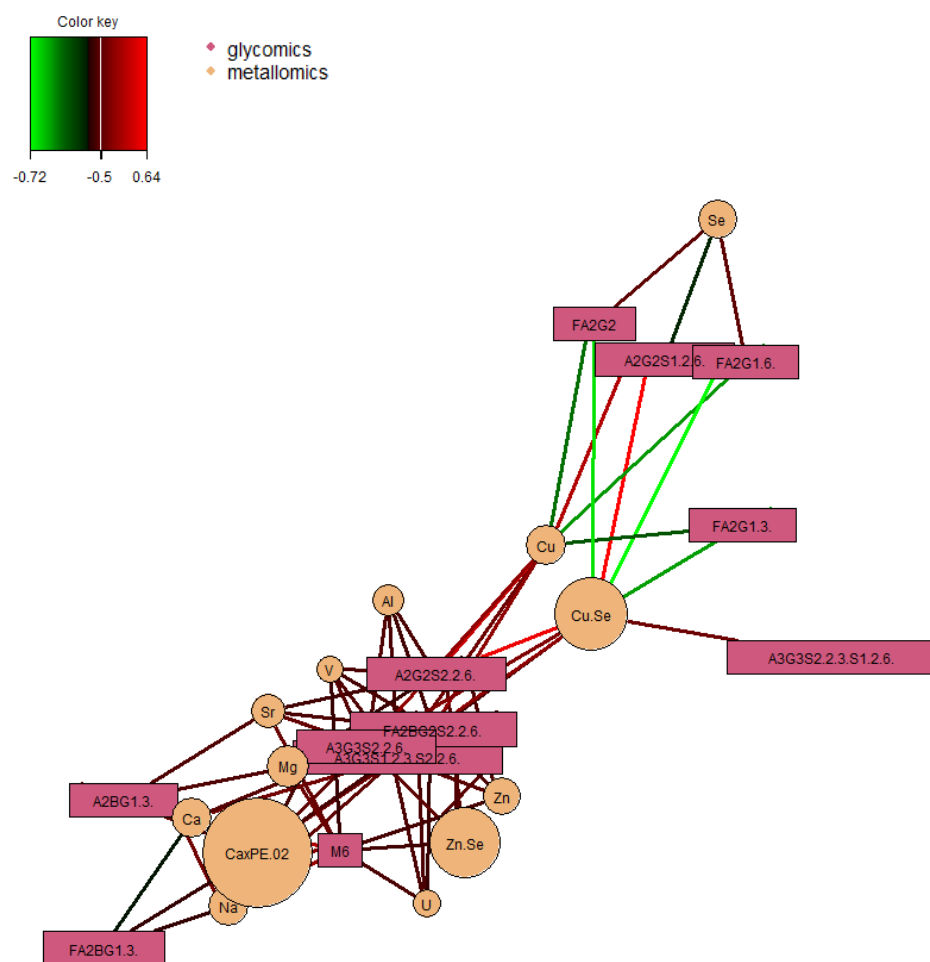

**Figure S4.** Bi-omics (glycomics + metallomics) relevance network plot of highly significant features correlated ( $r > 0.5$ ;  $p$ -value  $< 0.05$ ).

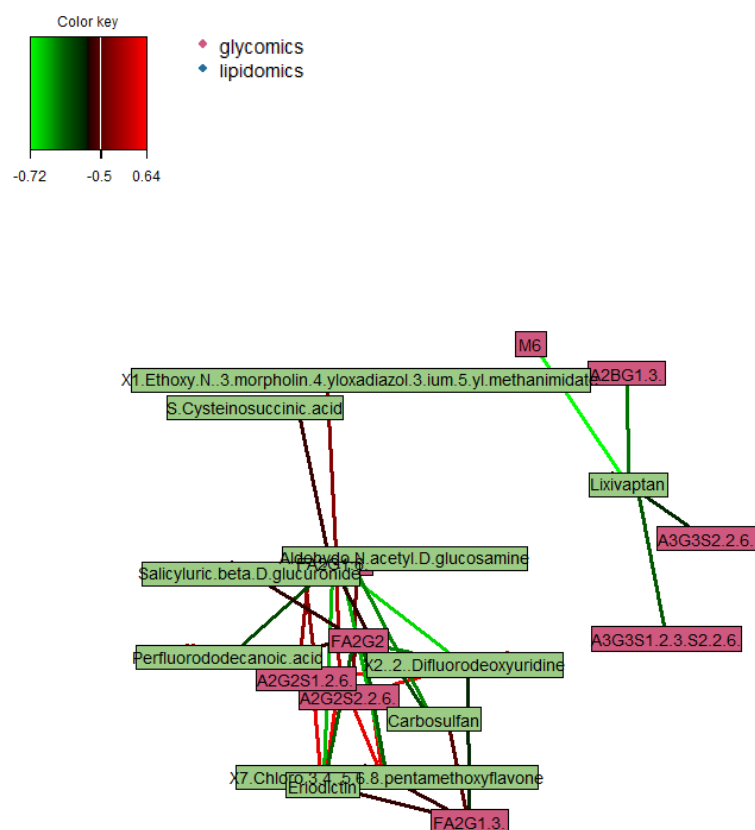

**Figure S5.** Bi-omics (glycomics + lipidomics) relevance network plot of highly significant features correlated ( $r > 0.5$ ;  $p$ -value  $< 0.05$ ).



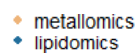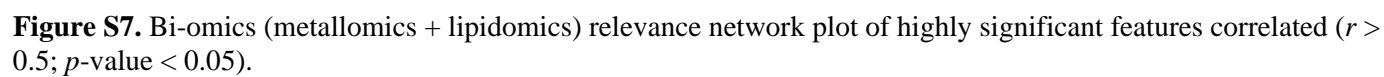

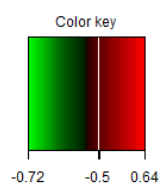

- metallomics
- metabolomics

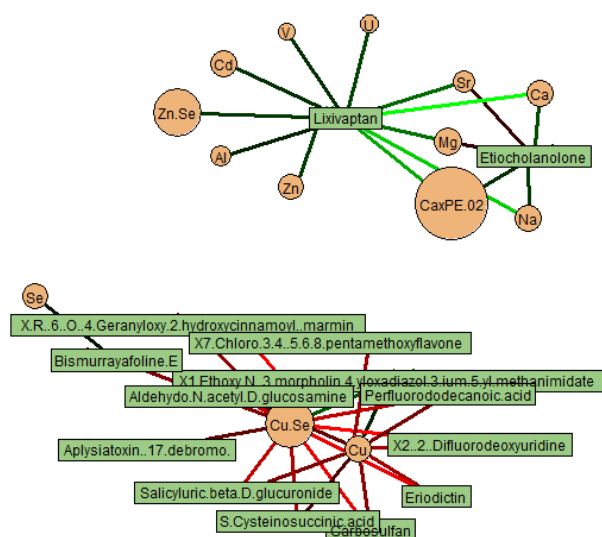

**Figure S8.** Bi-omics (metallomics + metabolomics) relevance network plot of highly significant features correlated ( $r > 0.5$ ;  $p$ -value  $< 0.05$ ).
